# Supplementary material
Source: PubMed Central journal article supplement (PMC9001025)
Supplement: NIHMS1789175-supplement-1.pdf [file NIHMS1789175-supplement-1.pdf]

Table 1. Baseline characteristics of 100,314 California Teachers Study participants according to sugar-sweetened beverage<sup>a</sup> consumption in semiquantitative frequency categories.

| Characteristic <sup>b***</sup>           | Rare or never           | >rare or never<br>to <1 serving<br>per week | ≥1 serving<br>per week<br>to <1 serving<br>per day | ≥1 serving per<br>day | Total         |
|------------------------------------------|-------------------------|---------------------------------------------|----------------------------------------------------|-----------------------|---------------|
| <b>No. of participants</b>               |                         | N                                           |                                                    |                       |               |
|                                          | 40,579                  | 33,773                                      | 21,665                                             | 4,297                 | 100,314       |
| <b>Dietary Intake</b>                    | Mean ± SEM <sup>c</sup> |                                             |                                                    |                       |               |
| Energy, kcal/day                         | 1,756.6 ± 3.4           | 1,957.5 ± 3.7                               | 2,047.7 ± 4.6                                      | 2,248.5 ± 10.3        | 1,908.2 ± 2.2 |
| Fruit and vegetable, g/day               | 359.6 ± 0.9             | 299.9 ± 0.9                                 | 285.1 ± 1.2                                        | 265.4 ± 2.7           | 319.4 ± 0.6   |
| Vegetables, g/day                        | 183.9 ± 0.5             | 163.4 ± 0.6                                 | 163.3 ± 0.7                                        | 166.9 ± 1.7           | 171.8 ± 0.4   |
| Red meat, g/day                          | 29.1 ± 0.2              | 34.7 ± 0.2                                  | 36.3 ± 0.2                                         | 36.8 ± 0.5            | 32.9 ± 0.1    |
| Processed meat intake, g/day             | 6.3 ± 0.1               | 8.2 ± 0.1                                   | 8.4 ± 0.1                                          | 8.7 ± 0.2             | 7.5 ± 0.0     |
| Fish                                     | 20.4 ± 0.1              | 19.4 ± 0.1                                  | 20.1 ± 0.1                                         | 20.3 ± 0.4            | 20.0 ± 0.1    |
| Refined carbs                            | 240.7 ± 0.7             | 270.7 ± 0.8                                 | 275.7 ± 1.0                                        | 278.1 ± 2.3           | 260.0 ± 0.5   |
| Dietary fiber                            | 20.3 ± 0.0              | 20.4 ± 0.1                                  | 20.2 ± 0.1                                         | 20.2 ± 0.1            | 20.3 ± 0.0    |
| Coffee and tea                           | 150.1 ± 0.7             | 134.4 ± 0.7                                 | 133.4 ± 0.9                                        | 134.5 ± 2.1           | 140.5 ± 0.4   |
|                                          | Mean ± SEM <sup>c</sup> |                                             |                                                    |                       |               |
| <b>SSB<sup>d</sup> intake, fl oz/day</b> | 0 ± 0.0                 | 2.6 ± 0.0                                   | 5.5 ± 0.0                                          | 13.6 ± 0.1            | 2.7 ± 0.0     |
| <b>Age, years</b>                        | 55.3 ± 0.1              | 48.9 ± 0.1                                  | 48.8 ± 0.1                                         | 48.6 ± 0.2            | 51.5 ± 0.0    |
| <b>MVPA<sup>e</sup>, minutes/week</b>    | 240.4 ± 1.2             | 215.4 ± 1.4                                 | 221.7 ± 1.7                                        | 222.2 ± 3.8           | 227.1 ± 0.8   |
| <b>Race/ethnicity</b>                    | N (%)                   |                                             |                                                    |                       |               |
| White                                    | 36,568 (90.1)           | 28,531 (84.5)                               | 18,471 (85.3)                                      | 3,774 (87.8)          | 87,344 (87.1) |
| Asian/Pacific Islander                   | 1,092 (2.7)             | 1,518 (4.5)                                 | 815 (3.8)                                          | 115 (2.7)             | 3,540 (3.5)   |
| African-American                         | 663 (1.6)               | 1,077 (3.2)                                 | 663 (3.1)                                          | 117 (2.7)             | 2,520 (2.5)   |
| Hispanic/Latino                          | 1,248 (3.1)             | 1,720 (5.1)                                 | 1,083 (5.0)                                        | 180 (4.2)             | 4,231 (4.2)   |
| Native American                          | 296 (0.7)               | 239 (0.7)                                   | 148 (0.7)                                          | 25 (0.6)              | 708 (0.7)     |
| Other/Mixed                              | 410 (1.0)               | 447 (1.3)                                   | 297 (1.4)                                          | 56 (1.3)              | 1,210 (1.2)   |
| Unknown                                  | 302 (0.7)               | 241 (0.7)                                   | 188 (0.9)                                          | 30 (0.7)              | 761 (0.8)     |
| <b>Education<sup>f</sup></b>             |                         |                                             |                                                    |                       |               |
| Academic/Professional doctorate          | 1,062 (2.6)             | 761 (2.3)                                   | 515 (2.4)                                          | 125 (2.9)             | 2,463 (2.5)   |
| Master's degree                          | 10,640 (26.2)           | 9,203 (27.3)                                | 5,801 (26.8)                                       | 1,182 (27.5)          | 26,826 (26.7) |
| Bachelor's degree                        | 9,167 (22.6)            | 7,906 (23.4)                                | 4,612 (21.3)                                       | 874 (20.3)            | 22,559 (22.5) |
| Associate's degree or less               | 134 (0.3)               | 138 (0.4)                                   | 103 (0.5)                                          | 19 (0.4)              | 394 (0.4)     |
| Unknown                                  | 19,576 (48.2)           | 15,765 (46.7)                               | 10,634 (49.1)                                      | 2,097 (48.8)          | 48,072 (47.9) |
| <b>Occupation</b>                        |                         |                                             |                                                    |                       |               |
| Teacher, any kind                        | 20,236 (49.9)           | 20,965 (62.1)                               | 13,715 (63.3)                                      | 2,802 (65.2)          | 57,718 (57.5) |
| Pupil services                           | 1,102 (2.7)             | 1,082 (3.2)                                 | 679 (3.1)                                          | 132 (3.1)             | 2,995 (3.0)   |
| Administration                           | 1,267 (3.1)             | 1,195 (3.5)                                 | 850 (3.9)                                          | 191 (4.4)             | 3,503 (3.5)   |
| Any other combination                    | 565 (1.4)               | 593 (1.8)                                   | 370 (1.7)                                          | 71 (1.7)              | 1,599 (1.6)   |
| Unknown                                  | 17,409 (42.9)           | 9,938 (29.4)                                | 6,051 (27.9)                                       | 1,101 (25.6)          | 34,499 (34.4) |
| <b>Socioeconomic status</b>              |                         |                                             |                                                    |                       |               |
| 1 <sup>st</sup> quartile, low            | 1,422 (3.5)             | 1,421 (4.2)                                 | 914 (4.2)                                          | 168 (3.9)             | 3,925 (3.9)   |
| 2 <sup>nd</sup> quartile, low-medium     | 6,124 (15.1)            | 5,628 (16.7)                                | 3,671 (16.9)                                       | 684 (15.9)            | 16,107 (16.1) |
| 3 <sup>rd</sup> quartile, medium-high    | 12,044 (29.7)           | 10,736 (31.8)                               | 6,639 (30.6)                                       | 1,366 (31.8)          | 30,785 (30.7) |
| 4 <sup>th</sup> quartile, high           | 17,791 (43.8)           | 13,905 (41.2)                               | 9,107 (42.0)                                       | 1,814 (42.2)          | 42,617 (42.5) |
| Unknown                                  | 3,198 (7.9)             | 2,083 (6.2)                                 | 1,334 (6.2)                                        | 265 (6.2)             | 6,880 (6.9)   |
| <b>Marital status</b>                    |                         |                                             |                                                    |                       |               |
| Married                                  | 18,668 (46.0)           | 16,701 (49.5)                               | 10,234 (47.2)                                      | 1,995 (46.4)          | 47,598 (47.5) |

|                                                                     |                |                             |                |                |                |
|---------------------------------------------------------------------|----------------|-----------------------------|----------------|----------------|----------------|
| Separated/Divorced                                                  | 3,815 (9.4)    | 3,017 (8.9)                 | 1,830 (8.5)    | 406 (9.5)      | 9,068 (9.0)    |
| Widowed                                                             | 3,327 (8.2)    | 1,579 (4.7)                 | 1,011 (4.7)    | 182 (4.2)      | 6,099 (6.1)    |
| All other                                                           | 14,769 (36.4)  | 12,476 (36.9)               | 8,590 (39.7)   | 1,714 (39.9)   | 37,549 (37.4)  |
| <b>Smoking, current</b>                                             | 2,047 (5.0)    | 1,487 (4.4)                 | 1,123 (5.2)    | 329 (7.7)      | 4,986 (5.0)    |
| <b>Alcohol consumption, <math>\geq 20</math> g/day</b>              | 4,045 (10.0)   | 2,411 (7.1)                 | 1,638 (7.8)    | 326 (7.8)      | 8,420 (8.4)    |
|                                                                     |                | Mean $\pm$ SEM <sup>b</sup> |                |                |                |
| <b>BMI, kg/m<sup>2</sup></b>                                        | 24.7 $\pm$ 0.0 | 24.6 $\pm$ 0.0              | 24.9 $\pm$ 0.0 | 25.5 $\pm$ 0.1 | 24.7 $\pm$ 0.0 |
|                                                                     |                | N (%)                       |                |                |                |
| <b>Obese, BMI<sup>g</sup> <math>\geq 30</math> kg/m<sup>2</sup></b> | 5,013 (12.4)   | 4,146 (12.3)                | 2,992 (13.8)   | 752 (17.5)     | 12,903 (12.9)  |
| <b>Hypertension</b>                                                 | 7,042 (17.4)   | 4,134 (12.2)                | 2,885 (13.3)   | 616 (14.3)     | 14,677 (14.6)  |
| <b>Daily aspirin use</b>                                            | 3,268 (8.1)    | 1,691 (5.0)                 | 1,135 (5.2)    | 268 (6.2)      | 6,362 (6.3)    |
| <b>Daily antihypertensive medication use</b>                        | 6,444 (15.9)   | 3,562 (10.6)                | 2,504 (11.6)   | 547 (12.7)     | 13,057 (13.0)  |
| <b>Daily multivitamin use</b>                                       | 16,244 (40.0)  | 10,777 (31.9)               | 7,035 (32.5)   | 1,495 (34.8)   | 35,551 (35.4)  |
| <b>Diabetes family history<sup>h</sup></b>                          | 8,448 (20.8)   | 6,463 (19.1)                | 4,213 (19.5)   | 844 (19.6)     | 19,968 (19.9)  |
| <b>Cardiovascular disease family history<sup>i</sup></b>            | 20,804 (51.3)  | 14,991 (44.4)               | 9,726 (44.9)   | 1,970 (45.9)   | 47,491 (47.3)  |
| <b>Cancer family history<sup>j</sup></b>                            | 22,060 (54.4)  | 17,511 (51.9)               | 11,246 (51.9)  | 2,283 (53.1)   | 53,095 (52.9)  |
| <b>Menopausal status and HT<sup>k</sup> use</b>                     |                |                             |                |                |                |
| Premenopausal                                                       | 13,120 (32.3)  | 17,120 (50.7)               | 10,843 (50.1)  | 2,129 (49.6)   | 43,212 (43.1)  |
| Peri- or postmenopausal, no HT use                                  | 5,474 (13.5)   | 2,933 (8.7)                 | 1,922 (8.9)    | 361 (8.4)      | 10,690 (10.7)  |
| Peri- or postmenopausal, past HT use                                | 3,185 (7.9)    | 1,625 (4.8)                 | 1,080 (5.0)    | 209 (4.9)      | 6,099 (6.1)    |
| Peri- or postmenopausal, current HT use, Estrogen                   | 6,254 (15.4)   | 3,633 (10.8)                | 2,296 (10.6)   | 477 (11.1)     | 12,660 (12.6)  |
| Peri- or postmenopausal, current HT use, Estrogen & Progesterone    | 7,161 (17.7)   | 4,428 (13.1)                | 2,780 (12.8)   | 520 (12.1)     | 14,889 (14.8)  |
| Peri- or postmenopausal, all other HT combinations                  | 5,385 (13.3)   | 4,034 (11.9)                | 2,744 (12.7)   | 601 (14.0)     | 12,764 (12.7)  |
| <b>Oral contraception use, past and current</b>                     | 24,578 (60.6)  | 24,049 (71.2)               | 15,567 (71.9)  | 3,130 (72.8)   | 67,324 (67.1)  |

<sup>a</sup>1 serving of caloric soft drink is 12 fluid ounces, 1 serving of sweetened bottled water/tea or fruit drink is 8 fluid ounces.

<sup>b</sup> $\chi^2$  tests were used for each variable to examine differences across categories. All variables have a p-value of <0.0001.

<sup>c</sup>SEM=standard error of the mean.

<sup>d</sup>SSB=sugar-sweetened beverage.

<sup>e</sup>MVPA=moderate-vigorous physical activity.

<sup>f</sup>Education was obtained after baseline, during fourth mail-in questionnaire follow-up (2005-2008).

<sup>g</sup>BMI=body mass index.

<sup>h</sup>Diabetes family history of first-degree relatives (parent, sibling, offspring).

<sup>i</sup>Cardiovascular disease family history includes heart attack/myocardial infarction and stroke family history of first-degree relatives (parent, sibling, offspring).

<sup>j</sup>Cancer family history of first-degree relatives (parent, sibling, offspring).

<sup>k</sup>HT=hormone therapy.

\*\*\* All variables have a p-value of <0.0001.

Table 2. Mortality risk<sup>a</sup> in California Teachers Study participants (n=100,314) according to sugar-sweetened beverage<sup>b</sup> consumption in semiquantitative frequency categories.

| Mortality                                           | Sugar-Sweetened Beverage Consumption |                                       |                                                 |                       | P trend |
|-----------------------------------------------------|--------------------------------------|---------------------------------------|-------------------------------------------------|-----------------------|---------|
|                                                     | Rare/<br>never                       | >rare/never to <1<br>serving per week | ≥1 serving per<br>week to <1<br>serving per day | ≥1 serving per<br>day |         |
| <b>All-cause</b>                                    |                                      |                                       |                                                 |                       |         |
| No. of deaths                                       | 7,838                                | 3,569                                 | 2,301                                           | 435                   |         |
| Rate per 1,000 person-years                         | 10.4                                 | 5.5                                   | 5.5                                             | 5.3                   |         |
| Age-adjusted HR <sup>c</sup> (95% CI <sup>d</sup> ) | 1.0                                  | 0.97 (0.93, 1.01)                     | 1.02 (0.98, 1.07)                               | 1.17 (1.06, 1.28)     | 0.04    |
| Multivariable-adjusted HR (95% CI)                  |                                      |                                       |                                                 |                       |         |
| Model 1 <sup>e</sup>                                | 1.0                                  | 1.00 (0.96, 1.04)                     | 1.02 (0.97, 1.07)                               | 1.07 (0.97, 1.17)     | 0.17    |
| Model 2 <sup>f,g</sup>                              | 1.0                                  | 0.98 (0.94, 1.02)                     | 0.98 (0.93, 1.03)                               | 1.03 (0.93, 1.15)     | 0.94    |
| <b>Cardiovascular disease-specific</b>              |                                      |                                       |                                                 |                       |         |
| No. of deaths                                       | 2,513                                | 1,042                                 | 641                                             | 117                   |         |
| Rate per 1,000 person-years                         | 3.3                                  | 1.6                                   | 1.5                                             | 1.4                   |         |
| Age-adjusted HR (95% CI)                            | 1.0                                  | 0.99 (0.92, 1.07)                     | 1.02 (0.93, 1.11)                               | 1.22 (1.02, 1.47)     | 0.09    |
| Multivariable-adjusted HR (95% CI)                  |                                      |                                       |                                                 |                       |         |
| Model 1                                             | 1.0                                  | 1.01 (0.93, 1.08)                     | 1.00 (0.92, 1.09)                               | 1.08 (0.90, 1.30)     | 0.55    |
| Model 2                                             | 1.0                                  | 0.98 (0.91, 1.06)                     | 0.94 (0.86, 1.03)                               | 1.00 (0.81, 1.22)     | 0.44    |
| <b>Cancer-specific</b>                              |                                      |                                       |                                                 |                       |         |
| No. of deaths                                       | 2,097                                | 1,137                                 | 741                                             | 152                   |         |
| Rate per 1,000 person-years                         | 2.8                                  | 1.8                                   | 1.8                                             | 1.8                   |         |
| Age-adjusted HR (95% CI)                            | 1.0                                  | 0.96 (0.89, 1.03)                     | 1.00 (0.92, 1.08)                               | 1.11 (0.94, 1.31)     | 0.31    |
| Multivariable-adjusted HR (95% CI)                  |                                      |                                       |                                                 |                       |         |
| Model 1                                             | 1.0                                  | 1.00 (0.93, 1.08)                     | 1.01 (0.93, 1.10)                               | 1.05 (0.89, 1.24)     | 0.58    |
| Model 2                                             | 1.0                                  | 1.00 (0.93, 1.08)                     | 0.98 (0.89, 1.07)                               | 1.03 (0.87, 1.23)     | 0.99    |
| <b>Other-cause</b>                                  |                                      |                                       |                                                 |                       |         |
| No. of deaths                                       | 3,228                                | 1,390                                 | 919                                             | 166                   |         |
| Rate per 1,000 person-years                         | 4.3                                  | 2.1                                   | 2.2                                             | 2.0                   |         |
| Age-adjusted HR (95% CI)                            | 1.0                                  | 0.96 (0.90, 1.02)                     | 1.04 (0.97, 1.12)                               | 1.18 (1.01, 1.38)     | 0.03    |
| Multivariable-adjusted HR (95% CI)                  |                                      |                                       |                                                 |                       |         |
| Model 1                                             | 1.0                                  | 0.98 (0.92, 1.04)                     | 1.03 (0.96, 1.11)                               | 1.07 (0.91, 1.25)     | 0.26    |
| Model 2                                             | 1.0                                  | 0.94 (0.88, 1.01)                     | 0.98 (0.91, 1.06)                               | 1.00 (0.84, 1.18)     | 0.83    |

<sup>a</sup>Total person-time: 1,897,745 years.

<sup>b</sup>1 serving of caloric soft drink is 12 fluid ounces, 1 serving of sweetened bottled water/tea or fruit drink is 8 fluid ounces.

<sup>c</sup>HR=hazard ratio

<sup>d</sup>CI=confidence interval.

<sup>e</sup>Model 1 adjusted for: age, race/ethnicity, socioeconomic status, marital status, smoking, alcohol intake, cardiovascular disease family history, cancer family history, diabetes family history, history of hypertension, physical activity, aspirin use, multivitamin use, use of at least one anti-hypertensive medication, menopausal status, menopausal hormone therapy use, and oral contraceptive use.

<sup>f</sup>Model 2 adjusted for: age, race/ethnicity, socioeconomic status, marital status, smoking, alcohol intake, history of hypertension, physical activity, aspirin use, multivitamin use, use of at least one anti-hypertensive medication, menopausal status, menopausal hormone therapy use, oral contraceptive use, body mass index, total energy intake, and intakes of fruit and vegetable, red meat, processed meat, fish, refined carbohydrates, dietary fiber, and coffee/tea beverages.

<sup>g</sup>Intakes of dietary variables are adjusted for energy intake (residual method) in Model 2 in addition to having total energy adjustment.

Table 3. Comprehensive mortality risk<sup>a</sup> in California Teachers Study participants (n=100,314) according to sugar-sweetened beverage<sup>b</sup> consumption in semiquantitative frequency categories.

| Mortality                                           | Sugar-Sweetened Beverage Consumption |                                    |                                           |                    | P trend |
|-----------------------------------------------------|--------------------------------------|------------------------------------|-------------------------------------------|--------------------|---------|
|                                                     | Rare/never                           | >rare/never to <1 serving per week | ≥1 serving per week to <1 serving per day | ≥1 serving per day |         |
| <b>All-cause</b>                                    |                                      |                                    |                                           |                    |         |
| No. of deaths                                       | 7,838                                | 3,569                              | 2,301                                     | 435                |         |
| Rate per 1,000 person-years                         | 10.4                                 | 5.5                                | 5.5                                       | 5.3                |         |
| Age-adjusted HR <sup>c</sup> (95% CI <sup>d</sup> ) | 1.0                                  | 0.97 (0.93, 1.01)                  | 1.02 (0.98, 1.07)                         | 1.17 (1.06, 1.28)  | 0.04    |
| Multivariable-adjusted HR (95% CI)                  |                                      |                                    |                                           |                    |         |
| Model 1 <sup>e</sup>                                | 1.0                                  | 1.00 (0.96, 1.04)                  | 1.02 (0.97, 1.07)                         | 1.07 (0.97, 1.17)  | 0.17    |
| Model 2 <sup>f,g</sup>                              | 1.0                                  | 0.98 (0.94, 1.02)                  | 0.98 (0.93, 1.03)                         | 1.03 (0.93, 1.15)  | 0.94    |
| Model 3 <sup>h</sup>                                | 1.0                                  | 1.00 (0.96, 1.04)                  | 1.01 (0.96, 1.06)                         | 1.08 (0.97, 1.19)  | 0.19    |
| Model 4 <sup>i,j</sup>                              | 1.0                                  | 0.97 (0.94, 1.02)                  | 0.97 (0.93, 1.03)                         | 1.03 (0.93, 1.14)  | 0.97    |
| <b>Cardiovascular disease-specific</b>              |                                      |                                    |                                           |                    |         |
| No. of deaths                                       | 2,513                                | 1,042                              | 641                                       | 117                |         |
| Rate per 1,000 person-years                         | 3.3                                  | 1.6                                | 1.5                                       | 1.4                |         |
| Age-adjusted HR (95% CI)                            | 1.0                                  | 0.99 (0.92, 1.07)                  | 1.02 (0.93, 1.11)                         | 1.22 (1.02, 1.47)  | 0.09    |
| Multivariable-adjusted HR (95% CI)                  |                                      |                                    |                                           |                    |         |
| Model 1                                             | 1.0                                  | 1.01 (0.93, 1.08)                  | 1.00 (0.92, 1.09)                         | 1.08 (0.90, 1.30)  | 0.55    |
| Model 2                                             | 1.0                                  | 0.98 (0.91, 1.06)                  | 0.94 (0.86, 1.03)                         | 1.00 (0.81, 1.22)  | 0.44    |
| Model 3                                             | 1.0                                  | 1.01 (0.94, 1.09)                  | 0.99 (0.90, 1.08)                         | 1.07 (0.88, 1.30)  | 0.76    |
| Model 4                                             | 1.0                                  | 0.99 (0.92, 1.07)                  | 0.96 (0.87, 1.05)                         | 1.03 (0.84, 1.26)  | 0.73    |
| <b>Cancer-specific</b>                              |                                      |                                    |                                           |                    |         |
| No. of deaths                                       | 2,097                                | 1,137                              | 741                                       | 152                |         |
| Rate per 1,000 person-years                         | 2.8                                  | 1.8                                | 1.8                                       | 1.8                |         |
| Age-adjusted HR (95% CI)                            | 1.0                                  | 0.96 (0.89, 1.03)                  | 1.00 (0.92, 1.08)                         | 1.11 (0.94, 1.31)  | 0.31    |
| Multivariable-adjusted HR (95% CI)                  |                                      |                                    |                                           |                    |         |
| Model 1                                             | 1.0                                  | 1.00 (0.93, 1.08)                  | 1.01 (0.93, 1.10)                         | 1.05 (0.89, 1.24)  | 0.58    |
| Model 2                                             | 1.0                                  | 1.00 (0.93, 1.08)                  | 0.98 (0.89, 1.07)                         | 1.03 (0.87, 1.23)  | 0.99    |
| Model 3                                             | 1.0                                  | 1.01 (0.94, 1.09)                  | 0.99 (0.91, 1.08)                         | 1.07 (0.90, 1.26)  | 0.64    |
| Model 4                                             | 1.0                                  | 1.00 (0.93, 1.08)                  | 0.98 (0.89, 1.07)                         | 1.03 (0.87, 1.22)  | 0.96    |
| <b>Other-cause</b>                                  |                                      |                                    |                                           |                    |         |
| No. of deaths                                       | 3,228                                | 1,390                              | 919                                       | 166                |         |
| Rate per 1,000 person-years                         | 4.3                                  | 2.1                                | 2.2                                       | 2.0                |         |
| Age-adjusted HR (95% CI)                            | 1.0                                  | 0.96 (0.90, 1.02)                  | 1.04 (0.97, 1.12)                         | 1.18 (1.01, 1.38)  | 0.03    |
| Multivariable-adjusted HR (95% CI)                  |                                      |                                    |                                           |                    |         |
| Model 1                                             | 1.0                                  | 0.98 (0.92, 1.04)                  | 1.03 (0.96, 1.11)                         | 1.07 (0.91, 1.25)  | 0.26    |
| Model 2                                             | 1.0                                  | 0.94 (0.88, 1.01)                  | 0.98 (0.91, 1.06)                         | 1.00 (0.84, 1.18)  | 0.83    |
| Model 3                                             | 1.0                                  | 0.98 (0.91, 1.04)                  | 1.04 (0.96, 1.12)                         | 1.09 (0.93, 1.28)  | 0.17    |
| Model 4                                             | 1.0                                  | 0.95 (0.89, 1.02)                  | 1.00 (0.92, 1.08)                         | 1.03 (0.87, 1.21)  | 0.82    |

<sup>a</sup>Total person-time: 1,897,745 years.

<sup>b</sup>1 serving of caloric soft drink is 12 fluid ounces, 1 serving of sweetened bottled water/tea or fruit drink is 8 fluid ounces.

<sup>c</sup>HR=hazard ratio

<sup>d</sup>CI=confidence interval.

<sup>e</sup>Model 1 adjusted for: age, race/ethnicity, socioeconomic status, marital status, smoking, alcohol intake, cardiovascular disease family history, cancer family history, diabetes family history, history of hypertension, physical activity, aspirin use, multivitamin use, use of at least one anti-hypertensive medication, menopausal status, menopausal hormone therapy use, and oral contraceptive use.

<sup>f</sup>Model 2 adjusted for: age, race/ethnicity, socioeconomic status, marital status, smoking, alcohol intake, history of hypertension, physical activity, aspirin use, multivitamin use, use of at least one anti-hypertensive medication, menopausal status, menopausal hormone therapy use, oral contraceptive use, body mass index, total energy intake, and intakes of fruit and vegetable, red meat, processed meat, fish, refined carbohydrates, dietary fiber, and coffee/tea beverages.

<sup>g</sup>Intakes of dietary variables are adjusted for energy intake (residual method) in Model 2 in addition to having total energy adjustment.

<sup>h</sup>Model 3 adjusted for: variables in Model 1 and body mass index. This model assesses the impact of body mass index adjustment.

<sup>i</sup>Model 4 adjusted for: variables in Model 2 with the exception of total energy intake. This model assesses the impact of over-adjustment by total energy intake.

<sup>j</sup>Intakes of dietary variables are adjusted for energy intake (residual method) in Model 4.

Journal Pre-proof

Table 4. Mortality risk<sup>a</sup> in California Teachers Study participants (n=100,314) according to type of sugar-sweetened beverage<sup>b</sup> consumption in semiquantitative frequency categories.

| Mortality                                           | Sugar-Sweetened Beverage Consumption <sup>c</sup> |                                          |                                                 |                       | P trend |
|-----------------------------------------------------|---------------------------------------------------|------------------------------------------|-------------------------------------------------|-----------------------|---------|
|                                                     | Rare/<br>never                                    | >rare/never to<br><1 serving per<br>week | ≥1 serving per<br>week to <1<br>serving per day | ≥1 serving<br>per day |         |
| <b>All-Cause</b>                                    |                                                   |                                          |                                                 |                       |         |
| <b>Sweetened bottled waters/teas</b>                |                                                   |                                          |                                                 |                       |         |
| No. of deaths                                       | 10,394                                            | 1,759                                    | 1,598                                           | 392                   |         |
| Rate per 1,000 person-years                         | 54.8                                              | 9.3                                      | 8.4                                             | 2.1                   |         |
| Age-adjusted HR <sup>d</sup> (95% CI <sup>e</sup> ) | 1.0                                               | 0.95 (0.91, 1.01)                        | 0.97 (0.92, 1.02)                               | 1.05 (0.95, 1.16)     | 0.82    |
| Multivariable-adjusted HR (95% CI)                  |                                                   |                                          |                                                 |                       |         |
| Model 1 <sup>f</sup>                                | 1.0                                               | 0.98 (0.93, 1.03)                        | 0.98 (0.93, 1.03)                               | 0.98 (0.89, 1.09)     | 0.48    |
| Model 2 <sup>g,h</sup>                              | 1.0                                               | 0.98 (0.92, 1.03)                        | 0.97 (0.91, 1.02)                               | 0.96 (0.86, 1.06)     | 0.22    |
| Model 3 <sup>i</sup>                                | 1.0                                               | 0.98 (0.93, 1.03)                        | 0.98 (0.93, 1.04)                               | 0.99 (0.89, 1.10)     | 0.61    |
| Model 4 <sup>j,k</sup>                              | 1.0                                               | 0.98 (0.93, 1.03)                        | 0.97 (0.91, 1.02)                               | 0.96 (0.86, 1.07)     | 0.22    |
| <b>Fruit Drinks</b>                                 |                                                   |                                          |                                                 |                       |         |
| No. of deaths                                       | 13,296                                            | 500                                      | 307                                             | 40                    |         |
| Rate per 1,000 person-years                         | 7.8                                               | 4.4                                      | 4.2                                             | 4.5                   |         |
| Age-adjusted HR (95% CI)                            | 1.0                                               | 1.09 (0.99, 1.19)                        | 1.06 (0.95, 1.19)                               | 1.07 (0.78, 1.45)     | 0.13    |
| Multivariable-adjusted HR (95% CI)                  |                                                   |                                          |                                                 |                       |         |
| Model 1                                             | 1.0                                               | 1.10 (1.00, 1.21)                        | 1.07 (0.96, 1.20)                               | 1.00 (0.73, 1.36)     | 0.18    |
| Model 2                                             | 1.0                                               | 1.09 (0.99, 1.20)                        | 1.03 (0.91, 1.16)                               | 1.05 (0.75, 1.47)     | 0.33    |
| Model 3                                             | 1.0                                               | 1.11 (1.01, 1.22)                        | 1.06 (0.94, 1.19)                               | 1.07 (0.76, 1.50)     | 0.14    |
| Model 4                                             | 1.0                                               | 1.09 (0.99, 1.20)                        | 1.03 (0.91, 1.16)                               | 1.05 (0.75, 1.47)     | 0.32    |
| <b>Caloric soft drinks</b>                          |                                                   |                                          |                                                 |                       |         |
| No. of deaths                                       | 10,463                                            | 2,002                                    | 1,432                                           | 246                   |         |
| Rate per 1,000 person-years                         | 8.4                                               | 6.5                                      | 5.0                                             | 4.0                   |         |
| Age-adjusted HR (95% CI)                            | 1.0                                               | 0.96 (0.91, 1.00)                        | 1.06 (1.00, 1.12)                               | 1.51 (1.33, 1.71)     | <0.0001 |
| Multivariable-adjusted HR (95% CI)                  |                                                   |                                          |                                                 |                       |         |
| Model 1                                             | 1.0                                               | 0.98 (0.93, 1.03)                        | 1.04 (0.99, 1.10)                               | 1.35 (1.19, 1.54)     | <0.0001 |
| Model 2                                             | 1.0                                               | 0.96 (0.92, 1.01)                        | 1.00 (0.95, 1.07)                               | 1.26 (1.10, 1.43)     | 0.02    |
| Model 3                                             | 1.0                                               | 0.98 (0.93, 1.03)                        | 1.04 (0.98, 1.10)                               | 1.35 (1.18, 1.53)     | <0.0001 |
| Model 4                                             | 1.0                                               | 0.96 (0.92, 1.01)                        | 1.01 (0.95, 1.07)                               | 1.26 (1.10, 1.44)     | 0.01    |
| <b>Cardiovascular disease-specific</b>              |                                                   |                                          |                                                 |                       |         |
| <b>Sweetened bottled waters/teas</b>                |                                                   |                                          |                                                 |                       |         |
| No. of deaths                                       | 3,341                                             | 459                                      | 391                                             | 122                   |         |
| Rate per 1,000 person-years                         | 3.1                                               | 1.2                                      | 1.1                                             | 1.4                   |         |
| Age-adjusted HR (95% CI)                            | 1.0                                               | 0.91 (0.83, 1.01)                        | 0.88 (0.80, 0.98)                               | 1.28 (1.06, 1.53)     | 0.28    |
| Multivariable-adjusted HR (95% CI)                  |                                                   |                                          |                                                 |                       |         |
| Model 1                                             | 1.0                                               | 0.93 (0.85, 1.03)                        | 0.89 (0.80, 0.99)                               | 1.16 (0.97, 1.39)     | 0.74    |
| Model 2                                             | 1.0                                               | 0.93 (0.84, 1.04)                        | 0.88 (0.79, 0.99)                               | 1.11 (0.91, 1.35)     | 0.89    |
| Model 3                                             | 1.0                                               | 0.93 (0.84, 1.04)                        | 0.89 (0.80, 1.00)                               | 1.13 (0.93, 1.37)     | 0.90    |
| Model 4                                             | 1.0                                               | 0.93 (0.84, 1.04)                        | 0.88 (0.79, 0.99)                               | 1.11 (0.91, 1.34)     | 0.88    |
| <b>Fruit Drinks</b>                                 |                                                   |                                          |                                                 |                       |         |
| No. of deaths                                       | 4,082                                             | 152                                      | 73                                              | 6                     |         |

|                                    |     |                   |                   |                   |      |
|------------------------------------|-----|-------------------|-------------------|-------------------|------|
| Rate per 1,000 person-years        | 2.4 | 1.3               | 1.0               | 0.7               |      |
| Age-adjusted HR (95% CI)           | 1.0 | 1.19 (1.01, 1.40) | 0.92 (0.73, 1.16) | 0.57 (0.26, 1.27) | 0.68 |
| Multivariable-adjusted HR (95% CI) |     |                   |                   |                   |      |
| Model 1                            | 1.0 | 1.19 (1.01, 1.40) | 0.93 (0.73, 1.17) | 0.55 (0.25, 1.23) | 0.42 |
| Model 2                            | 1.0 | 1.20 (1.01, 1.43) | 0.87 (0.67, 1.11) | 0.52 (0.19, 1.37) | 0.32 |
| Model 3                            | 1.0 | 1.23 (1.04, 1.46) | 0.90 (0.70, 1.15) | 0.51 (0.19, 1.37) | 0.46 |
| Model 4                            | 1.0 | 1.21 (1.01, 1.43) | 0.87 (0.67, 1.11) | 0.52 (0.19, 1.39) | 0.32 |

#### Caloric soft drinks

|                                    |       |                   |                   |                   |       |
|------------------------------------|-------|-------------------|-------------------|-------------------|-------|
| No. of deaths                      | 3,222 | 612               | 428               | 51                |       |
| Rate per 1,000 person-years        | 2.6   | 2.0               | 1.5               | 0.8               |       |
| Age-adjusted HR (95% CI)           | 1.0   | 0.98 (0.90, 1.07) | 1.13 (1.02, 1.25) | 1.38 (1.05, 1.82) | 0.002 |
| Multivariable-adjusted HR (95% CI) |       |                   |                   |                   |       |
| Model 1                            | 1.0   | 0.99 (0.91, 1.08) | 1.10 (0.99, 1.22) | 1.19 (0.90, 1.57) | 0.04  |
| Model 2                            | 1.0   | 0.97 (0.88, 1.06) | 1.04 (0.93, 1.16) | 1.10 (0.82, 1.47) | 0.40  |
| Model 3                            | 1.0   | 0.98 (0.89, 1.08) | 1.08 (0.97, 1.20) | 1.18 (0.88, 1.57) | 0.10  |
| Model 4                            | 1.0   | 0.97 (0.88, 1.06) | 1.04 (0.93, 1.16) | 1.10 (0.82, 1.47) | 0.38  |

### Cancer-specific

#### Sweetened bottled waters/teas

|                                    |       |                   |                   |                   |      |
|------------------------------------|-------|-------------------|-------------------|-------------------|------|
| No. of deaths                      | 2,785 | 640               | 579               | 123               |      |
| Rate per 1,000 person-years        | 2.6   | 1.7               | 1.7               | 1.5               |      |
| Age-adjusted HR (95% CI)           | 1.0   | 1.04 (0.95, 1.13) | 1.03 (0.94, 1.12) | 0.92 (0.77, 1.10) | 0.68 |
| Multivariable-adjusted HR (95% CI) |       |                   |                   |                   |      |
| Model 1                            | 1.0   | 1.05 (0.96, 1.15) | 1.03 (0.94, 1.13) | 0.88 (0.73, 1.05) | 0.32 |
| Model 2                            | 1.0   | 1.06 (0.96, 1.16) | 1.01 (0.92, 1.11) | 0.84 (0.70, 1.02) | 0.15 |
| Model 3                            | 1.0   | 1.06 (0.97, 1.16) | 1.02 (0.93, 1.13) | 0.88 (0.73, 1.06) | 0.31 |
| Model 4                            | 1.0   | 1.06 (0.97, 1.16) | 1.01 (0.92, 1.12) | 0.84 (0.70, 1.02) | 0.15 |

#### Fruit Drinks

|                                    |       |                   |                   |                   |      |
|------------------------------------|-------|-------------------|-------------------|-------------------|------|
| No. of deaths                      | 3,866 | 153               | 93                | 15                |      |
| Rate per 1,000 person-years        | 2.3   | 1.3               | 1.3               | 1.7               |      |
| Age-adjusted HR (95% CI)           | 1.0   | 0.93 (0.79, 1.10) | 0.92 (0.75, 1.13) | 1.16 (0.70, 1.92) | 0.68 |
| Multivariable-adjusted HR (95% CI) |       |                   |                   |                   |      |
| Model 1                            | 1.0   | 0.99 (0.84, 1.17) | 0.96 (0.78, 1.18) | 1.07 (0.65, 1.78) | 0.90 |
| Model 2                            | 1.0   | 0.97 (0.82, 1.15) | 0.90 (0.72, 1.12) | 1.17 (0.70, 1.94) | 0.70 |
| Model 3                            | 1.0   | 0.97 (0.82, 1.15) | 0.91 (0.73, 1.13) | 1.21 (0.73, 2.00) | 0.83 |
| Model 4                            | 1.0   | 0.97 (0.82, 1.15) | 0.90 (0.72, 1.12) | 1.17 (0.70, 1.94) | 0.70 |

#### Caloric soft drinks

|                                    |       |                   |                   |                   |      |
|------------------------------------|-------|-------------------|-------------------|-------------------|------|
| No. of deaths                      | 3,004 | 581               | 440               | 102               |      |
| Rate per 1,000 person-years        | 2.4   | 1.9               | 1.5               | 1.7               |      |
| Age-adjusted HR (95% CI)           | 1.0   | 0.91 (0.83, 1.00) | 0.96 (0.86, 1.06) | 1.40 (1.15, 1.71) | 0.06 |
| Multivariable-adjusted HR (95% CI) |       |                   |                   |                   |      |
| Model 1                            | 1.0   | 0.96 (0.88, 1.05) | 0.99 (0.89, 1.10) | 1.36 (1.11, 1.66) | 0.04 |
| Model 2                            | 1.0   | 0.97 (0.88, 1.06) | 0.97 (0.87, 1.08) | 1.33 (1.08, 1.63) | 0.08 |
| Model 3                            | 1.0   | 0.97 (0.89, 1.07) | 0.99 (0.89, 1.10) | 1.38 (1.13, 1.69) | 0.03 |
| Model 4                            | 1.0   | 0.97 (0.88, 1.06) | 0.97 (0.87, 1.08) | 1.33 (1.08, 1.63) | 0.08 |

### Other-cause

#### Sweetened bottled waters/teas

|                                    |       |                   |                   |                   |        |
|------------------------------------|-------|-------------------|-------------------|-------------------|--------|
| No. of deaths                      | 4,268 | 660               | 628               | 147               |        |
| Rate per 1,000 person-years        | 3.9   | 1.7               | 1.8               | 1.7               |        |
| Age-adjusted HR (95% CI)           | 1.0   | 0.92 (0.85, 1.01) | 0.98 (0.90, 1.07) | 1.03 (0.87, 1.22) | 0.95   |
| Multivariable-adjusted HR (95% CI) |       |                   |                   |                   |        |
| Model 1                            | 1.0   | 0.95 (0.87, 1.03) | 0.99 (0.91, 1.08) | 0.96 (0.81, 1.13) | 0.59   |
| Model 2                            | 1.0   | 0.93 (0.85, 1.01) | 0.98 (0.89, 1.07) | 0.96 (0.81, 1.14) | 0.50   |
| Model 3                            | 1.0   | 0.93 (0.85, 1.02) | 1.00 (0.91, 1.09) | 1.00 (0.84, 1.18) | 0.91   |
| Model 4                            | 1.0   | 0.93 (0.85, 1.02) | 0.98 (0.89, 1.07) | 0.96 (0.81, 1.14) | 0.50   |
| <b>Fruit Drinks</b>                |       |                   |                   |                   |        |
| No. of deaths                      | 5,348 | 195               | 141               | 19                |        |
| Rate per 1,000 person-years        | 3.1   | 1.7               | 1.8               | 1.7               |        |
| Age-adjusted HR (95% CI)           | 1.0   | 1.11 (0.96, 1.28) | 1.27 (1.07, 1.50) | 1.31 (0.84, 2.06) | 0.002  |
| Multivariable-adjusted HR (95% CI) |       |                   |                   |                   |        |
| Model 1                            | 1.0   | 1.12 (0.97, 1.30) | 1.27 (1.08, 1.51) | 1.22 (0.78, 1.91) | 0.004  |
| Model 2                            | 1.0   | 1.11 (0.96, 1.30) | 1.26 (1.06, 1.50) | 1.27 (0.76, 2.10) | 0.005  |
| Model 3                            | 1.0   | 1.14 (0.98, 1.33) | 1.30 (1.09, 1.55) | 1.29 (0.78, 2.14) | 0.001  |
| Model 4                            | 1.0   | 1.12 (0.96, 1.30) | 1.26 (1.06, 1.50) | 1.27 (0.76, 2.11) | 0.005  |
| <b>Caloric soft drinks</b>         |       |                   |                   |                   |        |
| No. of deaths                      | 4,237 | 809               | 564               | 93                |        |
| Rate per 1,000 person-years        | 3.4   | 2.6               | 2.0               | 1.5               |        |
| Age-adjusted HR (95% CI)           | 1.0   | 0.96 (0.89, 1.04) | 1.06 (0.97, 1.16) | 1.59 (1.29, 1.96) | 0.0002 |
| Multivariable-adjusted HR (95% CI) |       |                   |                   |                   |        |
| Model 1                            | 1.0   | 0.98 (0.91, 1.06) | 1.04 (0.95, 1.14) | 1.42 (1.16, 1.75) | 0.005  |
| Model 2                            | 1.0   | 0.97 (0.88, 1.06) | 1.00 (0.91, 1.10) | 1.28 (1.02, 1.59) | 0.15   |
| Model 3                            | 1.0   | 0.97 (0.90, 1.05) | 1.05 (0.96, 1.15) | 1.39 (1.12, 1.72) | 0.008  |
| Model 4                            | 1.0   | 0.96 (0.88, 1.04) | 1.00 (0.91, 1.10) | 1.28 (1.02, 1.59) | 0.14   |

<sup>a</sup>Total person-time: 1,897,745 years.

<sup>b</sup>1 serving of caloric soft drink is 12 fluid ounces, 1 serving of sweetened bottled water/tea is 8 fluid ounces.

<sup>c</sup>Models were reciprocally adjusted for the other beverage types.

<sup>d</sup>HR=hazard ratio.

<sup>e</sup>CI=confidence interval.

<sup>f</sup>Model 1 adjusted for: age, race, socioeconomic status, marital status, smoking, alcohol intake, cardiovascular disease family history, cancer family history, diabetes family history, history of hypertension, physical activity, aspirin use, multivitamin use, use of at least one anti-hypertensive medication, menopausal status, menopausal hormone therapy use, and oral contraceptive use.

<sup>g</sup>Model 2 adjusted for: age, race/ethnicity, socioeconomic status, marital status, smoking, alcohol intake, history of hypertension, physical activity, aspirin use, multivitamin use, use of at least one anti-hypertensive medication, menopausal status, menopausal hormone therapy use, oral contraceptive use, body mass index, total energy intake, and intakes of fruit and vegetable, red meat, processed meat, fish, refined carbohydrates, dietary fiber, and coffee/tea beverages.

<sup>h</sup>Intakes of dietary variables are adjusted for energy intake (residual method) in Model 2 in addition to having total energy adjustment.

<sup>i</sup>Model 3 adjusted for: variables in Model 1 and body mass index. This model assesses the impact of body mass index adjustment.

<sup>j</sup>Model 4 adjusted for: variables in Model 2 with the exception of total energy intake. This model assesses the impact of over-adjustment by total energy intake.

<sup>k</sup>Intakes of dietary variables are adjusted for energy intake (residual method) in Model 4.



Table 5. Mortality risk<sup>a</sup> in California Teachers Study participants (n=100,314) according to sugar-sweetened beverage<sup>b</sup> consumption in cups per day categories.

| Mortality                                           | Sugar-Sweetened Beverage Consumption |                             |                    |                     |                   | P trend |
|-----------------------------------------------------|--------------------------------------|-----------------------------|--------------------|---------------------|-------------------|---------|
|                                                     | Rare/never                           | >rare/never to <0.5 cup/day | ≥0.5 to <1 cup/day | ≥1 to <1.5 cups/day | ≥1.5 cups/day     |         |
| <b>All-cause</b>                                    |                                      |                             |                    |                     |                   |         |
| No. of deaths                                       | 7,838                                | 4,239                       | 1,078              | 502                 | 486               |         |
| Rate per 1,000 person-years                         | 10.4                                 | 5.9                         | 5.2                | 5.0                 | 4.0               |         |
| Age-adjusted HR <sup>c</sup> (95% CI <sup>d</sup> ) | 1.0                                  | 0.95 (0.91, 0.99)           | 1.07 (1.00, 1.14)  | 1.16 (1.06, 1.27)   | 1.27 (1.16, 1.39) | <0.0001 |
| Multivariable-adjusted HR (95% CI)                  |                                      |                             |                    |                     |                   |         |
| Model 1 <sup>e</sup>                                | 1.0                                  | 0.97 (0.94, 1.01)           | 1.06 (1.00, 1.13)  | 1.11 (1.01, 1.22)   | 1.17 (1.06, 1.28) | <0.0001 |
| Model 2 <sup>f,g</sup>                              | 1.0                                  | 0.96 (0.92, 1.00)           | 1.03 (0.96, 1.10)  | 1.05 (0.95, 1.16)   | 1.12 (1.02, 1.24) | 0.01    |
| <b>Cardiovascular disease-specific</b>              |                                      |                             |                    |                     |                   |         |
| No. of deaths                                       | 2,513                                | 1,273                       | 291                | 116                 | 120               |         |
| Rate per 1,000 person-years                         | 3.3                                  | 1.8                         | 1.4                | 1.1                 | 1.0               |         |
| Age-adjusted HR (95% CI)                            | 1.0                                  | 0.98 (0.92, 1.05)           | 1.06 (0.94, 1.20)  | 1.03 (0.86, 1.24)   | 1.29 (1.08, 1.55) | 0.01    |
| Multivariable-adjusted HR (95% CI)                  |                                      |                             |                    |                     |                   |         |
| Model 1                                             | 1.0                                  | 1.00 (0.93, 1.07)           | 1.03 (0.91, 1.17)  | 0.97 (0.80, 1.17)   | 1.15 (0.96, 1.38) | 0.28    |
| Model 2                                             | 1.0                                  | 0.98 (0.91, 1.06)           | 0.98 (0.86, 1.12)  | 0.87 (0.71, 1.07)   | 1.09 (0.90, 1.32) | 0.96    |
| <b>Cancer-specific</b>                              |                                      |                             |                    |                     |                   |         |
| No. of deaths                                       | 2,097                                | 1,318                       | 361                | 175                 | 176               |         |
| Rate per 1,000 person-years                         | 2.8                                  | 1.8                         | 1.7                | 1.7                 | 1.5               |         |
| Age-adjusted HR (95% CI)                            | 1.0                                  | 0.94 (0.88, 1.01)           | 1.04 (0.93, 1.16)  | 1.12 (0.95, 1.30)   | 1.12 (0.96, 1.31) | 0.03    |
| Multivariable-adjusted HR (95% CI)                  |                                      |                             |                    |                     |                   |         |
| Model 1                                             | 1.0                                  | 0.97 (0.91, 1.04)           | 1.06 (0.95, 1.19)  | 1.11 (0.95, 1.29)   | 1.10 (0.94, 1.28) | 0.05    |
| Model 2                                             | 1.0                                  | 0.97 (0.90, 1.04)           | 1.03 (0.91, 1.16)  | 1.07 (0.91, 1.26)   | 1.07 (0.91, 1.26) | 0.19    |
| <b>Other-cause</b>                                  |                                      |                             |                    |                     |                   |         |
| No. of deaths                                       | 3,228                                | 1,648                       | 426                | 211                 | 190               |         |
| Rate per 1,000 person-years                         | 4.3                                  | 2.3                         | 2.1                | 2.1                 | 1.6               |         |
| Age-adjusted HR (95% CI)                            | 1.0                                  | 0.93 (0.87, 0.99)           | 1.09 (0.99, 1.21)  | 1.28 (1.12, 1.48)   | 1.34 (1.16, 1.56) | <0.0001 |
| Multivariable-adjusted HR (95% CI)                  |                                      |                             |                    |                     |                   |         |
| Model 1                                             | 1.0                                  | 0.95 (0.89, 1.01)           | 1.08 (0.98, 1.20)  | 1.22 (1.06, 1.40)   | 1.23 (1.06, 1.43) | <0.0001 |
| Model 2                                             | 1.0                                  | 0.92 (0.87, 0.98)           | 1.06 (0.95, 1.18)  | 1.15 (0.99, 1.34)   | 1.18 (1.01, 1.38) | 0.002   |

<sup>a</sup>Total person-time: 1,897,745 years.

<sup>b</sup>1 cup is 8 fluid ounces.

<sup>c</sup>HR=hazard ratio

<sup>d</sup>CI=confidence interval.

<sup>e</sup>Model 1 adjusted for: age, race/ethnicity, socioeconomic status, marital status, smoking, alcohol intake, cardiovascular disease family history, cancer family history, diabetes family history, history of hypertension, physical activity, aspirin use, multivitamin use, use of at least one anti-hypertensive medication, menopausal status, menopausal hormone therapy use, and oral contraceptive use.

<sup>f</sup>Model 2 adjusted for: age, race/ethnicity, socioeconomic status, marital status, smoking, alcohol intake, history of hypertension, physical activity, aspirin use, multivitamin use, use of at least one anti-hypertensive medication, menopausal status, menopausal hormone therapy use, oral contraceptive use, body mass index, total energy intake, and intakes of fruit and vegetable, red meat, processed meat, fish, refined carbohydrates, dietary fiber, and coffee/tea beverages.

<sup>g</sup>Intakes of dietary variables are adjusted for energy intake (residual method) in Model 2 in addition to having total energy adjustment.

Table 6. Mortality risk<sup>a</sup> in California Teachers Study participants (n=100,000) according to sugar-sweetened beverage<sup>b</sup> consumption in semiquantitative frequency categories after removal of events that occurred at 2 years follow-up.

| Mortality                                           | Sugar-Sweetened Beverage Consumption |                                    |                                           |                    | P trend |
|-----------------------------------------------------|--------------------------------------|------------------------------------|-------------------------------------------|--------------------|---------|
|                                                     | Rare or never                        | >rare/never to <1 serving per week | ≥1 serving per week to <1 serving per day | ≥1 serving per day |         |
| <b>All-Cause</b>                                    |                                      |                                    |                                           |                    |         |
| No. of deaths                                       | 7,668                                | 3,489                              | 2,253                                     | 419                |         |
| Rate per 1,000 person-years                         | 10.2                                 | 5.4                                | 5.4                                       | 5.1                |         |
| Age-adjusted HR <sup>c</sup> (95% CI <sup>d</sup> ) | 1.0                                  | 0.97 (0.93, 1.01)                  | 1.02 (0.98, 1.07)                         | 1.15 (1.04, 1.27)  | 0.008   |
| Multivariable-adjusted HR (95% CI)                  |                                      |                                    |                                           |                    |         |
| Model 1 <sup>e</sup>                                | 1.0                                  | 0.99 (0.96, 1.04)                  | 1.02 (0.97, 1.07)                         | 1.05 (0.96, 1.16)  | 0.22    |
| Model 2 <sup>f,g</sup>                              | 1.0                                  | 0.97 (0.93, 1.02)                  | 0.97 (0.93, 1.02)                         | 1.00 (0.90, 1.11)  | 0.56    |
| <b>Cardiovascular disease-specific</b>              |                                      |                                    |                                           |                    |         |
| No. of deaths                                       | 2,463                                | 1,020                              | 625                                       | 112                |         |
| Rate per 1,000 person-years                         | 3.3                                  | 1.6                                | 1.5                                       | 1.4                |         |
| Age-adjusted HR (95% CI)                            | 1.0                                  | 0.99 (0.92, 1.07)                  | 1.01 (0.93, 1.11)                         | 1.20 (0.99, 1.45)  | 0.14    |
| Multivariable-adjusted HR (95% CI)                  |                                      |                                    |                                           |                    |         |
| Model 1                                             | 1.0                                  | 1.00 (0.93, 1.08)                  | 1.00 (0.92, 1.09)                         | 1.06 (0.88, 1.29)  | 0.66    |
| Model 2                                             | 1.0                                  | 0.96 (0.89, 1.04)                  | 0.95 (0.87, 1.04)                         | 1.00 (0.82, 1.21)  | 0.90    |
| <b>Cancer-specific</b>                              |                                      |                                    |                                           |                    |         |
| No. of deaths                                       | 2,018                                | 1,098                              | 721                                       | 144                |         |
| Rate per 1,000 person-years                         | 2.7                                  | 1.7                                | 1.7                                       | 1.7                |         |
| Age-adjusted HR (95% CI)                            | 1.0                                  | 0.95 (0.88, 1.03)                  | 1.00 (0.92, 1.09)                         | 1.09 (0.92, 1.29)  | 0.40    |
| Multivariable-adjusted HR (95% CI)                  |                                      |                                    |                                           |                    |         |
| Model 1                                             | 1.0                                  | 1.00 (0.92, 1.07)                  | 1.02 (0.93, 1.11)                         | 1.03 (0.87, 1.23)  | 0.65    |
| Model 2                                             | 1.0                                  | 1.00 (0.93, 1.08)                  | 0.99 (0.90, 1.08)                         | 1.01 (0.85, 1.21)  | 0.72    |
| <b>Other-cause</b>                                  |                                      |                                    |                                           |                    |         |
| No. of deaths                                       | 3,187                                | 1,371                              | 907                                       | 163                |         |
| Rate per 1,000 person-years                         | 4.2                                  | 2.1                                | 2.2                                       | 2.0                |         |
| Age-adjusted HR (95% CI)                            | 1.0                                  | 0.96 (0.90, 1.02)                  | 1.04 (0.97, 1.12)                         | 1.17 (1.00, 1.37)  | 0.04    |
| Multivariable-adjusted HR (95% CI)                  |                                      |                                    |                                           |                    |         |
| Model 1                                             | 1.0                                  | 0.98 (0.92, 1.04)                  | 1.03 (0.96, 1.11)                         | 1.07 (0.91, 1.25)  | 0.26    |
| Model 2                                             |                                      | 0.94 (0.88, 1.01)                  | 0.96 (0.91, 1.07)                         | 1.00 (0.84, 1.19)  | 0.58    |

<sup>a</sup>Total person-time: 1,897,362 years.

<sup>b</sup>1 serving of caloric soft drink is 12 fluid ounces, 1 serving of sweetened bottled water/tea or fruit drink is 8 fluid ounces.

<sup>c</sup>HR=hazard ratio

<sup>d</sup>CI=confidence interval.

<sup>e</sup>Model 1 adjusted for: age, race/ethnicity, socioeconomic status, marital status, smoking, alcohol intake, cardiovascular disease family history, cancer family history, diabetes family history, history of hypertension, physical activity, aspirin use, multivitamin use, use of at least one anti-hypertensive medication, menopausal status, menopausal hormone therapy use, and oral contraceptive use

<sup>f</sup>Model 2 adjusted for: age, race/ethnicity, socioeconomic status, marital status, smoking, alcohol intake, history of hypertension, physical activity, aspirin use, multivitamin use, use of at least one anti-hypertensive medication, menopausal status, menopausal hormone therapy use, oral contraceptive use, body mass index, total energy intake, and intakes of fruit and vegetable, red meat, processed meat, fish, refined carbohydrates, dietary fiber, and coffee/tea beverages.

<sup>g</sup>Intakes of dietary variables are adjusted for energy intake (residual method) in Model 2 in addition to having total energy adjustment.

Table 7. Mortality risk<sup>a</sup> in California Teachers Study participants (n=100,000) according to sugar-sweetened beverage<sup>b</sup> consumption in cups per day categories after removal of events that occurred at 2 years follow-up.

| Mortality                                           | Sugar-Sweetened Beverage Consumption |                             |                    |                     |                   | P trend |
|-----------------------------------------------------|--------------------------------------|-----------------------------|--------------------|---------------------|-------------------|---------|
|                                                     | Rare/never                           | >rare/never to <0.5 cup/day | ≥0.5 to <1 cup/day | ≥1 to <1.5 cups/day | ≥1.5 cups/day     |         |
| <b>All Cause</b>                                    |                                      |                             |                    |                     |                   |         |
| No. of deaths                                       | 7,668                                | 4,150                       | 1,062              | 482                 | 467               |         |
| Rate per 1,000 person-years                         | 10.2                                 | 5.8                         | 5.1                | 4.8                 | 3.9               |         |
| Age-adjusted HR <sup>c</sup> (95% CI <sup>d</sup> ) | 1.0                                  | 0.95 (0.91, 0.99)           | 1.08 (1.01, 1.15)  | 1.14 (1.04, 1.25)   | 1.25 (1.13, 1.37) | <0.0001 |
| Multivariable-adjusted HR (95% CI)                  |                                      |                             |                    |                     |                   |         |
| Model 1 <sup>e</sup>                                | 1.0                                  | 0.97 (0.94, 1.01)           | 1.07 (1.00, 1.14)  | 1.09 (1.00, 1.20)   | 1.15 (1.05, 1.26) | <0.0001 |
| Model 2 <sup>f,g</sup>                              | 1.0                                  | 0.95 (0.92, 0.99)           | 1.03 (0.96, 1.10)  | 1.02 (0.92, 1.12)   | 1.09 (0.98, 1.20) | 0.06    |
| <b>Cardiovascular disease-specific</b>              |                                      |                             |                    |                     |                   |         |
| No. of deaths                                       | 2,463                                | 1,245                       | 287                | 109                 | 116               |         |
| Rate per 1,000 person-years                         | 3.3                                  | 1.7                         | 1.4                | 1.1                 | 1.0               |         |
| Age-adjusted HR (95% CI)                            | 1.0                                  | 0.98 (0.92, 1.05)           | 1.07 (0.95, 1.21)  | 0.99 (0.82, 1.21)   | 1.28 (1.06, 1.55) | 0.02    |
| Multivariable-adjusted HR (95% CI)                  |                                      |                             |                    |                     |                   |         |
| Model 1                                             | 1.0                                  | 0.99 (0.93, 1.07)           | 1.04 (0.92, 1.18)  | 0.93 (0.77, 1.13)   | 1.14 (0.95, 1.38) | 0.35    |
| Model 2                                             | 1.0                                  | 0.96 (0.89, 1.03)           | 1.00 (0.88, 1.13)  | 0.86 (0.71, 1.05)   | 1.02 (0.84, 1.23) | 0.88    |
| <b>Cancer-specific</b>                              |                                      |                             |                    |                     |                   |         |
| No. of deaths                                       | 2,018                                | 1,276                       | 354                | 166                 | 167               |         |
| Rate per 1,000 person-years                         | 2.7                                  | 1.8                         | 1.7                | 1.6                 | 1.4               |         |
| Age-adjusted HR (95% CI)                            | 1.0                                  | 0.94 (0.87, 1.01)           | 1.05 (0.94, 1.18)  | 1.09 (0.93, 1.28)   | 1.09 (0.93, 1.28) | 0.06    |
| Multivariable-adjusted HR (95% CI)                  |                                      |                             |                    |                     |                   |         |
| Model 1                                             | 1.0                                  | 0.97 (0.91, 1.05)           | 1.08 (0.96, 1.21)  | 1.08 (0.92, 1.27)   | 1.07 (0.91, 1.26) | 0.09    |
| Model 2                                             | 1.0                                  | 0.98 (0.91, 1.05)           | 1.05 (0.93, 1.18)  | 1.06 (0.89, 1.25)   | 1.06 (0.89, 1.26) | 0.09    |
| <b>Other-cause</b>                                  |                                      |                             |                    |                     |                   |         |
| No. of deaths                                       | 3,187                                | 1,629                       | 421                | 207                 | 184               |         |
| Rate per 1,000 person-years                         | 4.2                                  | 2.3                         | 2.0                | 2.0                 | 1.5               |         |
| Age-adjusted HR (95% CI)                            | 1.0                                  | 0.93 (0.87, 0.99)           | 1.10 (0.99, 1.21)  | 1.28 (1.11, 1.47)   | 1.32 (1.14, 1.53) | <0.0001 |
| Multivariable-adjusted HR (95% CI)                  |                                      |                             |                    |                     |                   |         |
| Model 1                                             | 1.0                                  | 0.95 (0.89, 1.01)           | 1.08 (0.97, 1.20)  | 1.21 (1.05, 1.40)   | 1.21 (1.04, 1.41) | 0.0001  |
| Model 2                                             | 1.0                                  | 0.92 (0.86, 0.98)           | 1.05 (0.94, 1.17)  | 1.13 (0.97, 1.32)   | 1.14 (0.97, 1.34) | 0.001   |

<sup>a</sup>Total person-time: 1,897,362 years.

<sup>b</sup>1 cup is 8 fluid ounces.

<sup>c</sup>HR=hazard ratio

<sup>d</sup>CI=confidence interval.

<sup>e</sup>Model adjusted for: age, race/ethnicity, socioeconomic status, marital status, smoking, alcohol intake, cardiovascular disease family history, cancer family history, diabetes family history, history of hypertension, physical activity, aspirin use, multivitamin use, use of at least one anti-hypertensive medication, menopausal status, menopausal hormone therapy use, and oral contraceptive use.

<sup>f</sup>Model 2 adjusted for: age, race/ethnicity, socioeconomic status, marital status, smoking, alcohol intake, history of hypertension, physical activity, aspirin use, multivitamin use, use of at least one anti-hypertensive medication, menopausal status, menopausal hormone therapy use, oral contraceptive use, body mass index, total energy intake, and intakes of fruit and vegetable, red meat, processed meat, fish, refined carbohydrates, dietary fiber, and coffee/tea beverages.

<sup>g</sup>Intakes of dietary variables are adjusted for energy intake (residual method) in Model 2 in addition to having total energy adjustment.
